# Supplementary material for: SeQuiLa-cov: A fast and scalable library for depth of coverage calculations
Source: PubMed Central journal article supplement (PMC6680061; doi:10.1093/gigascience/giz094), 2019-08-05
Supplement: giz094_response_to_reviewer_comments_revision_2.pdf [file giz094_response_to_reviewer_comments_revision_2.pdf]

## Author's Response To Reviewer Comments

Close

July 9, 2019

The Editor of GigaScience

Dear Editor,

As requested, we added the following statement and citation in section: "Availability of supporting data and materials":

An archival copy of the code and supporting data is also available via the GigaScience database GigaDB [18].

Most sincerely  
Tomasz Gambin, Ph. D.  
ZSI-Bio group (<http://biodatageeks.org>)  
Institute of Computer Science  
Warsaw University of Technology  
E-mail: [tgambin@ii.pw.edu.pl](mailto:tgambin@ii.pw.edu.pl)

Close
